# Supplementary material for: The National Institutes of Health funding for clinical research applying machine learning techniques in 2017
Source: Springer Nature journal article supplement (doi:10.1038/s41746-020-0223-9), 2020-01-31
Supplement: 41746_2020_223_MOESM1_ESM.pdf [file 41746_2020_223_MOESM1_ESM.pdf]

## **Supplemental tables**

Supplementary Table 1. The NIH Funding for Clinical Research Applying Machine Learning in 2017

Supplementary Table 2. NIH funding by application type

Supplementary Table 3. NIH grants by supporting year

Supplementary Table 4. Project numbers and Project titles of NIH grants

**Supplementary Table 1. The NIH Funding for Clinical Research Applying Machine Learning in 2017**

|                                                       |                           |
|-------------------------------------------------------|---------------------------|
| Total number of projects screened                     | 1964                      |
| Total number of projects excluded                     | 1423                      |
| Total number of unique project identification numbers | 520                       |
| Total number of projects                              | 535                       |
| Total amount of funding, \$                           | 264,941,309               |
| Median (IQR), \$                                      | 341,475 (183,049–581,327) |
| Mean (SD), \$                                         | 495,217 (810,048)         |
| Maximum amount received by a single grant, \$         | 12,560,000                |
| Number of Principal Investigators                     | 470                       |
| Number of institutions                                | 207                       |
| Number of NIH agencies                                | 27                        |
| Number of grant mechanisms                            | 54                        |
| NIH total budget for FY 2017, \$                      | 33,136,000,000            |
| NIH extramural budget for FY 2017, \$                 | 29,622,000,000            |
| Number of projects registered in ClinicalTrials.gov   | 151                       |

IQR, interquartile range; SD, standard deviation; FY, fiscal year; NIH, National Institutes of Health

**Supplementary Table 2. NIH funding by application type**

| <b>Application type</b>       | <b>Number of grants</b> | <b>Proportion of total number of grants</b> | <b>Total grant amount (\$)</b> | <b>Proportion of total value</b> |
|-------------------------------|-------------------------|---------------------------------------------|--------------------------------|----------------------------------|
| Noncompeting continuation (5) | 292                     | 54.8%                                       | 138,151,114                    | 52.2%                            |
| New application (1)           | 187                     | 35.1%                                       | 106,077,096                    | 40.1%                            |
| Renewal (2)                   | 29                      | 5.4%                                        | 13,862,777                     | 5.2%                             |
| Revision (3)                  | 18                      | 3.4%                                        | 3,457,700                      | 1.3%                             |
| Change of grantee (7)         | 5                       | 0.9%                                        | 2,609,456                      | 1.0%                             |
| Change of institute (9)       | 1                       | 0.2%                                        | 359,872                        | 0.1%                             |
| Extension (4)                 | 1                       | 0.2%                                        | 248,807                        | 0.1%                             |

**Supplementary Table 3. NIH grants by supporting year**

| <b>Support year</b> | <b>Total number of grants</b> | <b>Proportion of total number of grants</b> | <b>Total grant amount (\$)</b> | <b>Proportion of total value of grants</b> |
|---------------------|-------------------------------|---------------------------------------------|--------------------------------|--------------------------------------------|
| 1 yr                | 176                           | 32.9%                                       | 96,728,108                     | 36.5%                                      |
| 2–5 yrs             | 264                           | 49.3%                                       | 124,454,116                    | 47.0%                                      |
| 6–10 yrs            | 39                            | 7.3%                                        | 20,696,923                     | 7.8%                                       |
| >10 yrs             | 56                            | 10.5%                                       | 23,062,162                     | 8.7%                                       |

**Supplementary Table 4. Project numbers and Project titles of NIH grants**

|    | <b>Project number</b> | <b>Project Title</b>                                                                                                        |
|----|-----------------------|-----------------------------------------------------------------------------------------------------------------------------|
| 1  | 1DP2MD012722-01       | Machine Learning For Health Outcomes And Quality Of Care In Low-Income Populations                                          |
| 2  | 1F30HL136001-01A1     | Perinatal Origins Of Asthma                                                                                                 |
| 3  | 1F30MH115584-01       | Genome Clustering For Clinical Subtype Detection In Autism                                                                  |
| 4  | 1F31CA214029-01       | Genotype And Histological Phenotype Relationships In Cancer; With Automated Therapy Optimization.                           |
| 5  | 1F31DA043328-01A1     | Predicting Stimulant Use Relapse Using Neuroimaging Techniques                                                              |
| 6  | 1F31HD091967-01       | Testing The Predictive Power Of Structural Neuroimaging In The Estimation Of Individuals' Reading And Attentional Abilities |
| 7  | 1F32HD091945-01       | Understanding Severe Maternal Morbidity: Predictors; Trends; And Disparities                                                |
| 8  | 1F99NS105210-01       | A Hybrid Neural-Machine Interface For Volitional Control Of A Powered Lower Limb Prosthesis                                 |
| 9  | 1K01DA041620-01A1     | Using Administrative And Clinical Data To Detect Drug Use And HIV Risk In Foster Care                                       |
| 10 | 1K01ES028055-01       | Using Clinical Data To Identify FDA-Approved Drugs For Cancer Prevention And Therapeutic Repurposing                        |
| 11 | 1K01HD091283-01       | Big Data Neuroimaging To Predict Motor Behavior After Stroke                                                                |
| 12 | 1K01HD093863-01       | Big Data And Network Analysis Of Children's Health                                                                          |
| 13 | 1K01HL135452-01       | The Effect Of Insufficient Sleep On Cardiovascular Disease Disparity Between Blacks And Whites                              |
| 14 | 1K01HL136687-01       | Data-Driven Identification Of The Acute Respiratory Distress Syndrome                                                       |
| 15 | 1K01HL137557-01       | Prediction Of Heart Failure In HIV-Infected Individuals                                                                     |
| 16 | 1K01LM012529-01A1     | Improved Disease Stratification Using Electronic Health Records                                                             |
| 17 | 1K02DA043063-01       | Classifying Addictions Using Machine Learning Analysis Of Multidimensional Data                                             |
| 18 | 1K02NS104207-01       | Quantitative Rehabilitation After Stroke                                                                                    |
| 19 | 1K08EB022631-01A1     | Identifying Opioid Response Phenotypes In Low Back Pain Electronic Health Data                                              |
| 20 | 1K08HL136850-01       | Improving Cardiovascular Drug Safety With Automated Bleeding Classification                                                 |
| 21 | 1K08HL136928-01       | Multi-Omic Subtyping Of Chronic Obstructive Pulmonary Disease                                                               |
| 22 | 1K24DC016312-01       | Prolonging Functional Speech In Persons With Amyotrophic Lateral Sclerosis: A Real-Time Virtual Vocal Tract                 |
| 23 | 1K99AR070902-01A1     | Multidimensional Mri-Based Big Data Analytics To Study Osteoarthritis                                                       |
| 24 | 1K99EB023279-01A1     | Spectroscopic Photoacoustic Molecular Imaging For Breast Lesion Characterization                                            |
| 25 | 1K99ES027022-01A1     | A Data Science Approach To Air Toxics And Children's Environmental Health                                                   |
| 26 | 1K99ES027511-01A1     | Air Pollution Exposures And Children's Health: Mediation And Interaction In A Counterfactual Framework                      |
| 27 | 1K99HG009680-01       | Beckon - Block Estimate Chain: Creating Knowledge On Demand & Protecting Privacy                                            |
| 28 | 1K99MH111807-01A1     | Estimating Population Effects In Mental Health Research Using Meta-Analysis                                                 |

|    |                   |                                                                                                                                                           |
|----|-------------------|-----------------------------------------------------------------------------------------------------------------------------------------------------------|
| 29 | 1OT2OD025286-01   | All Of Us; Wisconsin                                                                                                                                      |
| 30 | 1P01AI131374-01   | Core B: Bioinformatics/Biostatistics Core                                                                                                                 |
| 31 | 1P01AI131374-01   | Project 3: Identifying Plasma Biomarkers Predicting Time To HIV Rebound After Treatment Interruption                                                      |
| 32 | 1P42ES027704-01   | Data Science Core                                                                                                                                         |
| 33 | 1P50AR070590-01A1 | Core 2: Applied Meta'omics Core                                                                                                                           |
| 34 | 1P50CA211024-01A1 | Computational/Biostatistical Core                                                                                                                         |
| 35 | 1R01AG053949-01A1 | Advanced Machine Learning Algorithms That Integrate Genomewide; Longitudinal Mri And Demographic Data To Predict Future Cognitive Decline Toward Dementia |
| 36 | 1R01AG054523-01A1 | Blood Base Bioenergetic Profiling: A Novel Approach For Identifying Alzheimer's Disease Risk And Pathology                                                |
| 37 | 1R01AG054628-01A1 | Evaluating Longitudinal Changes In The Human Structural Connectome In Relation To Cognitive Aging                                                         |
| 38 | 1R01AG055121-01A1 | Predict-Adftd: Multimodal Imaging Prediction Of Ad/Ftd And Differential Diagnosis                                                                         |
| 39 | 1R01AG055132-01   | Using Connectomics To Characterize Risk For Alzheimer's Disease                                                                                           |
| 40 | 1R01AG055337-01A1 | Precede: Presurgical Cognitive Evaluation Via Digital Clockfacedrawing                                                                                    |
| 41 | 1R01AG056287-01   | The Phenotypic Landscape Of Cognitive Decline As Revealed By Next-Generation Multiplexed Ion Beam Imaging                                                 |
| 42 | 1R01AG056331-01   | Sleep Health Profiles And Mortality Risk In Older Adults: A Multi-Cohort Application Of Novel Statistical Methods                                         |
| 43 | 1R01AG057915-01   | Miriad - Multiplexed Imaging Of Resilience In Alzheimers Disease                                                                                          |
| 44 | 1R01AI127203-01A1 | Big Data Analytics Of Hiv Treatment Gaps In South Carolina: Identification And Prediction                                                                 |
| 45 | 1R01AI127250-01A1 | Big Data Analysis Of Hiv Risk And Epidemiology In Sub-Saharan Africa                                                                                      |
| 46 | 1R01AI130460-01   | Dynamic Learning For Post-Vaccine Event Prediction Using Temporal Information In Vaers                                                                    |
| 47 | 1R01AI132030-01   | Mining Real-Time Social Media Big Data To Monitor Hiv: Development And Ethical Issues                                                                     |
| 48 | 1R01CA203861-01A1 | Augmented Neurosurgical Navigation Software Using Resting State Mri                                                                                       |
| 49 | 1R01CA207375-01A1 | The Effectiveness; Safety; And Costs Of Guideline-Concordant Lung Nodule Care                                                                             |
| 50 | 1R01CA211224-01A1 | Devaluing Energy-Dense Foods For Cancer Control: Translational Neuroscience                                                                               |
| 51 | 1R01CA215318-01   | Calibrating Free-Living Physical Activity Characteristics Across Functionally-Limited Populations Using Machine-Learned Accelerometer Approaches          |
| 52 | 1R01CA218144-01   | Brain Cancer Radio-Pathomics For Predicting Heterogeneous Cytology                                                                                        |
| 53 | 1R01DA042988-01A1 | Effects Of Prenatal Cocaine On Early Brain Functional Connectivity And Behavior                                                                           |
| 54 | 1R01DA043690-01   | Meta-Analysis And Machine Learning: Towards Neuromarkers Of Craving And Relapse                                                                           |
| 55 | 1R01DA044170-01   | Using Existing Data To Understand And Ameliorate Risk In Opioid Agonist Therapy                                                                           |
| 56 | 1R01DA044985-01   | Using Machine Learning To Predict Problematic Prescription Opioid Use And Opioid Overdose                                                                 |
| 57 | 1R01DK110541-01A1 | Developing And Validating Prognostic Metabolomic Signatures Of Diabetic Kidney Disease                                                                    |
| 58 | 1R01DK113111-01   | Consortium For Radiologic Imaging Studies Of Polycystic Kidney Disease (Crisp) Iv: Prognosis For End-Stage Renal Disease And Biomarker Validation         |

|    |                   |                                                                                                                                                                              |
|----|-------------------|------------------------------------------------------------------------------------------------------------------------------------------------------------------------------|
| 59 | 1R01DK113269-01   | Development And Validation Of An Automated Measurement Of Child Screen Media Use: Flash                                                                                      |
| 60 | 1R01EB023942-01   | Deep Radiomic Decision Support System For Colorectal Cancer                                                                                                                  |
| 61 | 1R01EB023943-01   | Enabling Technology For Safe Robot-Assisted Surgical Micromanipulation                                                                                                       |
| 62 | 1R01EB025020-01   | Qubbd: Deep Poisson Methods For Biomedical Time-To-Event And Longitude Data                                                                                                  |
| 63 | 1R01EB025024-01   | Qubbd: Statistical & Visualization Methods For Pghd To Enable Precision Medicine                                                                                             |
| 64 | 1R01ES027747-01   | Air Particulate; Metals; And Cognitive Performance In An Aging Cohort- Roles Of Circulating Extracellular Vesicles And Non-Coding Rnas                                       |
| 65 | 1R01GM120624-01A1 | Computational Studies Of Virus-Host Interactions Using Metagenomics Data And Applications                                                                                    |
| 66 | 1R01GM123193-01   | Sepsis Early Prediction And Subphenotype Illumination Study (Sepsis)                                                                                                         |
| 67 | 1R01HD078532-01A1 | Developing Inhibitory Control                                                                                                                                                |
| 68 | 1R01HD087363-01A1 | Ped Screen: Pediatric Sepsis Ehr Registry; Clinical Outcomes; And Predictive Model                                                                                           |
| 69 | 1R01HD091179-01   | Neonatal Endotracheal Intubation: Enhancing Training Through Computer Simulation And Automated Evaluation                                                                    |
| 70 | 1R01HD092239-01   | Instrumental Screening For Dysphagia By Combining High-Resolution Cervical Auscultation With Advanced Data Analysis Tools To Identify Silent Dysphagia And Silent Aspiration |
| 71 | 1R01HD092331-01   | Externalizing Outcomes In High Risk Youth                                                                                                                                    |
| 72 | 1R01HL133786-01A1 | Exploring Statin Pleiotropic Effects Within A Very Large Ehr Cohort                                                                                                          |
| 73 | 1R01HL134673-01   | Phora: A Clinical Decision Support Tool For Patients With Pulmonary Arterial Hypertension                                                                                    |
| 74 | 1R01HL135219-01   | Community Surveillance Of Coronary Heart Disease                                                                                                                             |
| 75 | 1R01HL135557-01A1 | Integrated Analysis Of Coronary Anatomy And Biology With 18f-Fluoride Pet And Ct Angiography                                                                                 |
| 76 | 1R01HL136660-01   | Automated Detection And Prediction Of Atrial Fibrillation During Sepsis                                                                                                      |
| 77 | 1R01HL137763-01   | Magnetic Resonance Imaging Based Calf Muscle Perfusion To Assess Patients With Symptomatic Peripheral Artery Disease                                                         |
| 78 | 1R01LM012535-01   | Integrating Neuroimaging; Multi-Omics; And Clinical Data In Complex Disease                                                                                                  |
| 79 | 1R01LM012734-01   | Mechanistic Machine Learning                                                                                                                                                 |
| 80 | 1R01LM012815-01   | Improving Patient And Caregiver Engagement Through The Application Of Data Science Methods To Audio Recorded Clinic Visits Stored In Personal Health Libraries               |
| 81 | 1R01MH104030-01A1 | The New Tics Study: A Novel Approach To Pathophysiology And Cause Of Tic Disorders                                                                                           |
| 82 | 1R01MH110453-01A1 | Characterizing Trauma Outcomes: From Pre-Trauma Risk To Post-Trauma Sequelae                                                                                                 |
| 83 | 1R01MH111610-01A1 | Lifesense: Transforming Behavioral Assessment Of Depression Using Personal Sensing Technology                                                                                |
| 84 | 1R01MH112070-01A1 | Mapping Heterogeneity Of Neuroanatomical Imaging Signatures Of Psychosis Via Pattern Analysis                                                                                |
| 85 | 1R01MH113250-01   | Identifying Reproducible Brain Signatures Of Obsessive-Compulsive Profiles                                                                                                   |
| 86 | 1R01MH113406-01   | Machine Learning To Distinguish Hand From Alzheimer's Disease In Hiv Over Age 60                                                                                             |
| 87 | 1R01MH113570-01A1 | The Preterm Behavioral Phenotype: Trajectories Of Psychopathology & Changes In Cerebral Connectivity                                                                         |

|     |                   |                                                                                                                                                                                                        |
|-----|-------------------|--------------------------------------------------------------------------------------------------------------------------------------------------------------------------------------------------------|
| 88  | 1R01NR016732-01A1 | A Clinician-In-The-Loop Smart Home To Support Health Monitoring And Intervention For Chronic Conditions                                                                                                |
| 89  | 1R01NR016941-01   | Communicating Narrative Concerns Entered By Rns (Concern)                                                                                                                                              |
| 90  | 1R01NS100849-01A1 | Mid-Frontal Delta/Theta Rhythms And Cognitive Control In Pd                                                                                                                                            |
| 91  | 1R01NS102233-01   | Enabling Comparative Effectiveness Research In Silent Brain Infarction Through Natural Language Processing And Big Data                                                                                |
| 92  | 1R03DE026513-01A1 | Craniofacial Microsmia: Facial Expression From Ages 1 To 3 Years                                                                                                                                       |
| 93  | 1R13NS101927-01A1 | Ispw8 Conference: Designing The Next Generation Of Closed Loop Seizure Control                                                                                                                         |
| 94  | 1R21AA025193-01A1 | A Machine Learning Approach For Inferring Alcohol Intoxication Levels From Gait Data                                                                                                                   |
| 95  | 1R21AG055749-01   | Automated Assessment Of Cognitive Tests For Detecting Mild Cognitive Impairment                                                                                                                        |
| 96  | 1R21AR072263-01   | Algorithms To Identify Systemic Lupus From Electronic Health Record Data                                                                                                                               |
| 97  | 1R21CA212744-01   | Characterization Of Thyroid Nodules By Quantitative Ultrasound                                                                                                                                         |
| 98  | 1R21CA219229-01   | Using Big Data To Estimate The Effects Of Complex Cost-Sharing Rules On Colorectal Cancer Screening And Patient Health                                                                                 |
| 99  | 1R21DA043171-01   | Functional Dissection Of Prenatal Drug Effects On The Developing Brain And Behavior                                                                                                                    |
| 100 | 1R21EB024025-01   | Deep Radiomic Colon Cleansing For Laxative-Free Ct Colonography                                                                                                                                        |
| 101 | 1R21EY027945-01   | Machine Learning Methods For Detecting Disease-Related Functional And Structural Change In Glaucoma                                                                                                    |
| 102 | 1R21HD087749-01A1 | Vaccine Beliefs And Decision Making                                                                                                                                                                    |
| 103 | 1R21HD091500-01   | Evaluation Of Machine Learning To Mobilize Detection And Therapy Of Developmental Delay In Children                                                                                                    |
| 104 | 1R21HD092243-01   | A Functional Upper Limb Training And Assessment Tool To Enhance Efficacy And Scalability Of Rehabilitation In Ecological Environments                                                                  |
| 105 | 1R21LM012395-01A1 | Deconvolution Of Epigenomic Data To Characterize Cellular Subpopulations                                                                                                                               |
| 106 | 1R21LM012618-01   | Bayesian Generative Methods For Extracting And Modeling Relations In Ehr Narratives                                                                                                                    |
| 107 | 1R21MH113870-01   | Naturalistic Data Collection In The Smartplayroom                                                                                                                                                      |
| 108 | 1R21NS100244-01A1 | Development Of Automated Web-Based Spectroscopic Mri Clinical Interface                                                                                                                                |
| 109 | 1R21NS102828-01   | Deep Learning For Connectomics                                                                                                                                                                         |
| 110 | 1R25EB024327-01   | Development Of An Online Course Suite In Tools For Analysis Of Sensor-Based Behavioral Health Data (Aha!)                                                                                              |
| 111 | 1R25MH112480-01   | Summer Institute In Neuroimaging And Data Science                                                                                                                                                      |
| 112 | 1R41AA025297-01A1 | Patient Engagement Alcohol Risk Reduction System (Pears)                                                                                                                                               |
| 113 | 1R41AG056184-01   | Telehealth Intervention For Improved Blood Pressure Control With Targeted Incentives: Using New Technologies And Insights From Behavioral Economics To Increase The Effectiveness Of Behavioral Change |
| 114 | 1R42DA043977-01   | Advancing A Novel Portable Detection Method For Cannabis Intoxication                                                                                                                                  |
| 115 | 1R43AA026492-01   | Using The Lumme System To Improve Real-Time Blood Alcohol Detection                                                                                                                                    |
| 116 | 1R43AG057257-01   | Augmented Reality System For The Education Of Clinical Caregivers Of Older Adults                                                                                                                      |
| 117 | 1R43AG058354-01   | Real-Time Video Monitoring Of Falls In Memory-Care Facilities For Individuals With Alzheimer's And Related Dementias                                                                                   |



|     |                   |                                                                                                                                                                    |
|-----|-------------------|--------------------------------------------------------------------------------------------------------------------------------------------------------------------|
| 118 | 1R43AG058480-01   | Predictive Analytics For Alzheimer's Disease Dementia                                                                                                              |
| 119 | 1R43AR073114-01   | Optimizing Electrical Impedance Myography Outcomes Through Data Mining                                                                                             |
| 120 | 1R43DA044062-01   | Leveraging Predictive Analytics Within Social Networks To Maximize Drug And Alcohol Treatment Efficacy And Relapse Prevention                                      |
| 121 | 1R43DC016251-01A1 | User-Driven Fitting Of Hearing Aids And Other Assistive Hearing Devices                                                                                            |
| 122 | 1R43EB024299-01   | Improving Access To Vision Correction For Health Disparity Populations With The Quicksee: An Accurate; Low-Cost; Easy-To-Use Objective Refractor                   |
| 123 | 1R43GM122154-01   | Rule-Based Semantics And Big Data Based Methods For Effective Clinical Decision Support (Cds): A Pediatric Severe Sepsis Case Study Using Icu Data                 |
| 124 | 1R43GM122196-01   | Centralized Assay Datasets For Modelling Support Of Small Drug Discovery Organizations                                                                             |
| 125 | 1R43GM123851-01   | Development Of Deep Learning Models For Biomarker Identification And Classification                                                                                |
| 126 | 1R43HL135909-01A1 | Rule Based Semantics And Big Data Based Methods For Early Identification Of Patients At Risk Of Acute Respiratory Distress Syndrome (Ards)                         |
| 127 | 1R43LM012798-01   | Enabling Value-Based Healthcare Through Automating Risk Assessment For Episode-Based Care                                                                          |
| 128 | 1R43MH113408-01   | Evaluating The Comparative Validity And Reliability Of Seras: A Decision Support Tool For Assessing Near Term Risk Of Suicide In Emergency Departments             |
| 129 | 1R43MH114763-01   | Detecting And Monitoring Tardive Dyskinesia To Improve Patient Outcomes                                                                                            |
| 130 | 1R43NR015945-01A1 | Autonomous System Supporting Patient-Specific Transfer And Discharge Decisions                                                                                     |
| 131 | 1R43TR002047-01   | Software Platform To Stratify Patients For Treatment Arm Randomization In Human Clinical Trials Using Patient-Level Predictive Models                              |
| 132 | 1R44AG054256-01A1 | Characterizing Alzheimer's Disease With Inspecds: Integrated Neurocognitive And Sleep-Behavior Profiler For The Endophenotypic Classification Of Dementia Subtypes |
| 133 | 1R44DA044929-01A1 | The Blackfynn Platform For Rapid Data Integration And Collaboration                                                                                                |
| 134 | 1R44GM119858-01A1 | Adapting The Berkeley Big Data Analytics Stack To Genomics And Health                                                                                              |
| 135 | 1R44GM125438-01   | Clinical Resting State Fmri Software For Surgical Planning                                                                                                         |
| 136 | 1R44HD093467-01   | Automatic Positioning Of Communication Devices And Other Essential Equipment For People With Mobility Restrictions                                                 |
| 137 | 1R44HL132622-01A1 | Tailored Drug Titration Through Artificial Intelligence                                                                                                            |
| 138 | 1R44MH108177-01A1 | Web Software To Develop An Rdoc-Compatible Adaptive Diagnostic Nosology; The Sid-5                                                                                 |
| 139 | 1R56AG055728-01   | Integrated Model Of Palliative And Primary Care In Seriously Ill Older Adults                                                                                      |
| 140 | 1R56AG057195-01   | Early Onset Alzheimer's Disease Consortium                                                                                                                         |
| 141 | 1R56HL135425-01A1 | Mhealth For Heart Failure: Predictive Models Of Readmission Risk And Self-Care Using Consumer Activity Trackers                                                    |
| 142 | 1R56HL138415-01   | Interpretable Deep Learning Model For Longitudinal Electronic Health Records And Applications To Heart Failure Prediction                                          |
| 143 | 1R56NS096064-01A1 | Machine Learning-Based Control Of Functional Electrical Stimulation                                                                                                |
| 144 | 1S10OD021644-01A1 | From Genomics To Natural Language Processing: A Protected Environment For Research Computing In The Health Science                                                 |
| 145 | 1T15LM012500-01   | An Interdisciplinary Program For Advanced Training In Health Data Analytics                                                                                        |
| 146 | 1U01CA214411-01A1 | Engineering Personalized Micro-Tumor Ecosystems                                                                                                                    |

|     |                   |                                                                                                                                                |
|-----|-------------------|------------------------------------------------------------------------------------------------------------------------------------------------|
| 147 | 1U01HL137159-01   | Systems Level Causal Discovery In Heterogeneous Topmed Data                                                                                    |
| 148 | 1U01LM012675-01   | Crowd-Assisted Deep Learning (Cradle) Digital Curation To Translate Big Data Into Precision Medicine                                           |
| 149 | 1U01MH109985-01A1 | Mapping Connectomes For Disordered Emotional States                                                                                            |
| 150 | 1U01TR002062-01   | Open Health Natural Language Processing Collaboratory                                                                                          |
| 151 | 1U19AI128949-01   | Data Management And Analysis Core                                                                                                              |
| 152 | 1U19AI129910-01   | The Innate Immune Response As A Therapeutic Target For Cutaneous Leishmaniasis                                                                 |
| 153 | 1U19CA203654-01A1 | Core B: Biostatistics Core                                                                                                                     |
| 154 | 1U19NS104649-01   | Data Science Core                                                                                                                              |
| 155 | 1U19NS104653-01   | Data Science Core                                                                                                                              |
| 156 | 1U24CA224309-01   | Immune Monitoring And Analysis Of Cancer At Stanford (Imacs)                                                                                   |
| 157 | 1U24DK116204-01   | Illuminating Function Of The Understudied Druggable Kinome                                                                                     |
| 158 | 1U24HL138998-01   | Data; Modeling;And Coordination Center For Precise Network                                                                                     |
| 159 | 1U54CA209891-01A1 | Using Networks To Seed Hierarchical Whole-Cell Models Of Cancer                                                                                |
| 160 | 1U54CA224019-01   | Impact Of Leukemia Microenvironment On Response To Targeted Therapies In Aml                                                                   |
| 161 | 1U54HG009824-01   | The Nasopharyngeal Microbiota Of African Children And Lower Respiratory Tract Infection                                                        |
| 162 | 1U54NS105539-01   | Topological Mapping Of Immune; Microbiota; Metabolomic And Clinical Phenotypes To Reveal Me/Cfs Disease Mechanisms - Clinical Research Project |
| 163 | 1UH3NS103550-01   | Electrophysiological Biomarkers To Optimize Dbs For Depression                                                                                 |
| 164 | 1ZIAAG000342-01   | Machine-Learning Approaches To Understand Preclinical Pathogenesis And Identify Predictive Biomarkers Of Alzheimers Disease                    |
| 165 | 1ZIABC010837-11   | Disease Prognostication And Treatment Response In Rectal Cancer Patients                                                                       |
| 166 | 1ZIACL040004-15   | Computer Aided Detection For Radiologic Images                                                                                                 |
| 167 | 1ZIACL090018-08   | Computer-Aided Detection For Infectious Disease Imaging                                                                                        |
| 168 | 1ZIACT000199-28   | Biomedical Imaging And Visualization                                                                                                           |
| 169 | 1ZIACT000271-15   | Statistical Learning For Biomedical Data                                                                                                       |
| 170 | 1ZIACT000272-10   | Biomedical Image Analysis And Informatics                                                                                                      |
| 171 | 1ZIADA000614-01   | Mapping And Predicting Hiv-Transmission Hotspots With Phylogenetics And Geospatial Machine Learning                                            |
| 172 | 1ZIAHD008882-09   | Functional And Structural Optical Brain Imaging                                                                                                |
| 173 | 1ZIAHG000153-19   | Development Of Statistical Genetics Methodology                                                                                                |
| 174 | 1ZIALM010001-08   | Integrating Image And Text Information For Biomedical Information Retrieval                                                                    |
| 175 | 1ZIALM010004-02   | Image Analysis And Machine Learning For Pulmonary Disease Screening                                                                            |
| 176 | 1ZIALM010006-02   | Malariascreener: Image Analysis And Machine Learning For Detecting Malaria In Blood Film                                                       |
| 177 | 1ZIALM010009-01   | Natural Language Processing For Precision Medicine And Clinical And Consumer Health Question                                                   |
| 178 | 1ZIAMH002955-02   | Non-Invasive Neuromodulation Unit (Nnu)                                                                                                        |
| 179 | 1ZIAN003055-10    | Comprehensive Multimodal Analysis Of Patients With Neuroimmunological Diseases                                                                 |
| 180 | 1ZIASC010366-17   | Identification Of Genes For Predicting Prognosis In Pediatric Cancers                                                                          |
| 181 | 1ZICHL006228-01   | Bioinformatics Core                                                                                                                            |

|     |                     |                                                                                                                                                                                                    |
|-----|---------------------|----------------------------------------------------------------------------------------------------------------------------------------------------------------------------------------------------|
| 182 | 1ZIHCT000200-28     | Informatics; Machine Learning & Biomedical Data Science                                                                                                                                            |
| 183 | 1ZIHCT000260-22     | Computational Tools For Bioinformatics And Genome Analysis                                                                                                                                         |
| 184 | 261201700515P-0-0-1 | Igf::Ot::Igf Machine Learning Methods To Identify Bladder Cancer Cases Missed By Routine Surveillance                                                                                              |
| 185 | 271201700022C-0-0-1 | Igf::Ot::Igf Constructed Environments For Successfully Sustaining Abstinence Through Immersive And On-Demand Treatment. Period Of Performance: September 22; 2017 - March 21; 2018. N43da-17-5583. |
| 186 | 2P01AG005842-30     | 4 - Assessing The Overuse And Underuse Of Diagnostic Testing                                                                                                                                       |
| 187 | 2P01AG005842-30     | 5 - The Role Of Information Technology & Treatment Heterogeneity In Population Health                                                                                                              |
| 188 | 2P01AG005842-30     | Improving Health Outcomes For An Aging Population                                                                                                                                                  |
| 189 | 2P30AG028740-11     | Data Science And Applied Technology Core (Rc4)                                                                                                                                                     |
| 190 | 2P30DK079312-11     | Digital Analysis And Development                                                                                                                                                                   |
| 191 | 2P42ES004705-29     | Core E: Data Science And Laboratory Core                                                                                                                                                           |
| 192 | 2P50HD055784-11     | Clinical Phenotyping Core                                                                                                                                                                          |
| 193 | 2P50HD055784-11     | Genetics And Biomarkers Core                                                                                                                                                                       |
| 194 | 2R01DC011805-06     | Imaging Genetics Of Spasmodic Dysphonia                                                                                                                                                            |
| 195 | 2R01DC012033-06     | Automated Measurement Of Language Outcomes For Neurodevelopmental Disorders                                                                                                                        |
| 196 | 2R01EB006733-08     | Development Of Robust Brain Measurement Tools Informed By Ultrahigh Field 7t Mri                                                                                                                   |
| 197 | 2R01EB009352-09     | The Xnat Imaging Informatics Platform                                                                                                                                                              |
| 198 | 2R01EY023285-05     | Functional And Structural Optical Coherence Tomography For Glaucoma                                                                                                                                |
| 199 | 2R01GM105688-06     | National Infrastructure For Standardized And Portable Ehr Phenotyping Algorithms                                                                                                                   |
| 200 | 2R01GM108340-04     | Methods; Tools And Resources For Interactive Online Virtual Screening And Lead Optimization                                                                                                        |
| 201 | 2R01LM011369-05     | From Enrichment To Insights                                                                                                                                                                        |
| 202 | 2R01MH091864-06     | Predicting Heterogeneous Neurodevelopmental Outcomes In School-Age Children With Early Caregiving Adversities                                                                                      |
| 203 | 2R01MH096951-06     | Automatic Multimodal Affect Detection For Research And Clinical Use                                                                                                                                |
| 204 | 2R01NS073671-05A1   | Statistical Methods For Early Disease Prediction And Treatment Strategy Estimation Using Biomarker Signatures                                                                                      |
| 205 | 2R44AI124766-02A1   | Long Non-Coding Rna Signatures To Classify Multiple Sclerosis                                                                                                                                      |
| 206 | 2R44MH104102-03     | Tough Talks: A Disclosure Intervention For Hiv+ Ymsm                                                                                                                                               |
| 207 | 2R44TR000942-05     | Biocomputation Across Distributed Private Datasets To Enhance Drug Discovery                                                                                                                       |
| 208 | 2T32HL079896-11A1   | Integrated Biostatistical Training For Cvd Research                                                                                                                                                |
| 209 | 2U01AA014809-14     | Image Analysis Of Neurofacial Effects Of Prenatal Alcohol Exposure                                                                                                                                 |
| 210 | 2U19AI089676-08     | Center For The Study Of Complex Malaria In India                                                                                                                                                   |
| 211 | 2U54HG007480-05     | Use Clinical; Genomic; And Immunological Data For Studying Viral And Host Biology                                                                                                                  |
| 212 | 3F32GM116381-02S1   | Tracing The Evolution Of The Human Mutation Rate                                                                                                                                                   |
| 213 | 3F32MH108299-01A1S1 | Neuroimaging And Machine Learning To Redefine Anxiety And Depression                                                                                                                               |
| 214 | 3OT3TR002025-01S1   | Biomedical Data Translator Technical Feasibility Assessment And Architecture Design                                                                                                                |

|     |                   |                                                                                                                                                                    |
|-----|-------------------|--------------------------------------------------------------------------------------------------------------------------------------------------------------------|
| 215 | 3OT3TR002026-01S1 | Biomedical Data Translator Technical Feasibility Assessment And Architecture Design                                                                                |
| 216 | 3P30CA023108-38S4 | Bioinformatics (Bisr)                                                                                                                                              |
| 217 | 3R01DC013547-04S1 | Speech Movement Classification For Assessing And Treating Als                                                                                                      |
| 218 | 3R01EB006841-10S1 | Multivariate Methods For Identifying Multitask/Multimodal Brain Imaging Biomarkers                                                                                 |
| 219 | 3R01LM009254-11S1 | Bio Text Nlp                                                                                                                                                       |
| 220 | 3R01MH085651-08S1 | Decision Processes Of Late-Life Suicide                                                                                                                            |
| 221 | 3R43AG055203-01S1 | Mobile Application To Deliver Personalized Nutrition For The Prevention Of Alzheimer's Disease                                                                     |
| 222 | 3T15LM007124-21S1 | University Of Utah Biomedical Informatics Training Grant                                                                                                           |
| 223 | 3T15LM012500-01S1 | An Interdisciplinary Program For Advanced Training In Health Data Analytics                                                                                        |
| 224 | 3U01HG008679-03S1 | Omop Information Model For Emerge Phenotyping                                                                                                                      |
| 225 | 3U24DA041123-03S1 | Abcd-Usa Consortium: Data Analysis Center                                                                                                                          |
| 226 | 3U24DA041123-03S2 | Abcd-Usa Consortium: Data Analysis Center                                                                                                                          |
| 227 | 3U54EB020403-04S1 | Enigma Center For Worldwide Medicine; Imaging & Genomics                                                                                                           |
| 228 | 3U54GM114838-03S2 | Pilot For Creating Reproducible Workflows Using Docker Containers For Nih Commons                                                                                  |
| 229 | 4R00EB020749-03   | Stimulated Raman Imaging For Label-Free Histology To Guide Brain Tumor Surgery                                                                                     |
| 230 | 5F30CA206291-02   | Towards The Automation Of Mr Spectroscopic Imaging In Patients With Glioblastoma                                                                                   |
| 231 | 5F30CA210329-02   | Development Of A Multimodal Deep Learning Model For The Generation Of Cancer Probability Maps And Imaging Biomarkers For Prostate Cancer Using Multiparametric Mri |
| 232 | 5F31CA210607-02   | Discovery Of Pathogenic Germline Variants In Pediatric Cancers Using Genomics.                                                                                     |
| 233 | 5F31DE025176-03   | Signals Of Epigenetic Modification In Sjogrens Syndrome                                                                                                            |
| 234 | 5F31EY025532-03   | Deciding Where To Look Next: Frontal Eye Field's Role During Natural Viewing                                                                                       |
| 235 | 5F32GM116381-03   | Tracing The Evolution Of The Human Mutation Rate                                                                                                                   |
| 236 | 5F32NS093901-02   | The Role Of Sleep In Insight And Generalization                                                                                                                    |
| 237 | 5K01ES025442-04   | Nonparametric Bayes Methods For Big Data In Neuroscience                                                                                                           |
| 238 | 5K01ES025445-03   | Deep Learning And Streaming Analytics For Prediction Of Adverse Events In The Icu                                                                                  |
| 239 | 5K01ES026832-02   | Multi-Scale Data Integration Frameworks To Improve Cancer Outcomes                                                                                                 |
| 240 | 5K01ES026833-03   | Multiparametric Prediction Of Vasospasm After Subarachnoid Hemorrhage                                                                                              |
| 241 | 5K01ES026837-03   | Data-Mining Clinical Decision Support From Electronic Health Records                                                                                               |
| 242 | 5K01ES026839-03   | Epileptic Biomarkers And Big Data: Identifying Brain Regions To Resect In Patients With Refractory Epilepsy                                                        |
| 243 | 5K01HL124045-03   | Novel Informatics Approaches For Ascertainment Of Pad Status And Adverse Outcomes                                                                                  |
| 244 | 5K01LM012439-02   | Managing Dementia Through A Multisensory Smart Phone Application To Support Aging In Place                                                                         |
| 245 | 5K01MH099141-05   | Improved Methods To Assess The Comparative Safety Of New Psychiatric Medications                                                                                   |
| 246 | 5K01MH102415-04   | Application Of Cognitive; Emotional And Biological Dimensions - Resubmission - 1                                                                                   |
| 247 | 5K01MH105625-03   | Dynamic Brain Mechanisms Of Proactive And Reactive Control In Childhood Adhd                                                                                       |

|     |                 |                                                                                                                                                            |
|-----|-----------------|------------------------------------------------------------------------------------------------------------------------------------------------------------|
| 248 | 5K01MH106710-04 | Developing Risk Algorithms Of Internalizing Disorder Etiology And Course                                                                                   |
| 249 | 5K02AA023814-03 | Using Technology To Scale Up The Evaluation Of Motivational Interviewing                                                                                   |
| 250 | 5K02NS080885-05 | Intrinsic Cortical Networks And Cognitive Dysfunction In Parkinson's Disease                                                                               |
| 251 | 5K02NS089852-04 | Predicting Childhood Outcomes In Preterm Infants Using Cerebral Connectivity                                                                               |
| 252 | 5K07CA172677-05 | Developing Smokers For Smoker (S4s): A Collective Intelligence Tailoring System                                                                            |
| 253 | 5K07CA211786-02 | Improving Cancer Family History Collection Through Social Networking And Artificial Intelligence                                                           |
| 254 | 5K07CA212057-02 | Optimizing Long-Term Post-Polypectomy Surveillance For Colorectal Cancer Prevention Using A Prediction Rule Developed From A Large; Community-Based Cohort |
| 255 | 5K08AG048321-04 | Preventable Hospitalization In Dementia: The Impact Of Neuropsychiatric Symptoms                                                                           |
| 256 | 5K08HL121080-04 | Predicting In-Hospital Cardiac Arrest Using Electronic Health Record Data                                                                                  |
| 257 | 5K08MH107661-02 | Evaluation Of Neurobiological Models Of Adolescent Maltreatment Through Machine Learning                                                                   |
| 258 | 5K23AG042856-05 | Early Csf Detection Of Ftld                                                                                                                                |
| 259 | 5K23AG045957-05 | Early Detection Of Asymptomatic Middle-Age Adults At Risk For Ad                                                                                           |
| 260 | 5K23DK101687-03 | Improving Prediction Of Medical Responsiveness And Clinical Outcomes In Crohn's Disease                                                                    |
| 261 | 5K23HL119352-04 | Investigating Sedentary Time In Aging: New Directions Using Technology (Istand)                                                                            |
| 262 | 5K23HL126912-03 | Autoimmunity As A Mechanism For Atherosclerosis In Copd                                                                                                    |
| 263 | 5K23HL133495-02 | Acute Respiratory Distress Syndrome After Isolated Traumatic Brain Injury: Platelet Biology; Endothelial Activation; And Mechanical Ventilation            |
| 264 | 5K23MH102128-04 | Mhealth Intervention For Art Adherence And Sexual Risk Reduction Among Hiv+ Ymsm                                                                           |
| 265 | 5K24DA029262-08 | Neuroimaging And Mentoring In Translational Pain Research                                                                                                  |
| 266 | 5K24NR015812-03 | Mentoring And Research In Applying Digital Technologies To Prevent Chronic Illnesses                                                                       |
| 267 | 5K25CA181503-04 | Quantitative Analysis Of Gbm Invasion Mechanisms With New Imaging Protocol                                                                                 |
| 268 | 5K25DK097279-06 | Understanding And Predicting Cardiac Events In Hd Using Real-Time Ehrs                                                                                     |
| 269 | 5K25EB019032-03 | Body Surface Tracking Of Complex Motion With Obstructed Viewing In Hybrid Imaging                                                                          |
| 270 | 5K25HL130637-02 | Machine Learning Development For Subtyping Copd                                                                                                            |
| 271 | 5K99DA042127-02 | Mechanisms Underlying Differential Effects Of Neighborhood Poverty On Problematic Adolescent Drug Use                                                      |
| 272 | 5P01CA039542-29 | Core 1: Administration And Biostatistics                                                                                                                   |
| 273 | 5P01CA142538-08 | Project 3: Statistical/Computational Methods For Pharmacogenomics And Individuali                                                                          |
| 274 | 5P01HL094307-07 | Project 01: Mechanisms Of Extreme Phenotypes In Obstructive Sleep Apnea (Osa)                                                                              |
| 275 | 5P20GM103429-16 | Bioinformatics Core                                                                                                                                        |
| 276 | 5P20GM113126-02 | Data Management And Analysis Core                                                                                                                          |
| 277 | 5P30AG021332-15 | Biostatistics And Research Information Systems Core                                                                                                        |
| 278 | 5P30AG024832-13 | Biostatistics & Data Management Resource Core 3                                                                                                            |
| 279 | 5P30AG044281-05 | Pilot/Exploratory Studies                                                                                                                                  |
| 280 | 5P30CA023108-38 | Bioinformatics (Bisr)                                                                                                                                      |

|     |                 |                                                                                       |
|-----|-----------------|---------------------------------------------------------------------------------------|
| 281 | 5P30CA030199-36 | Bioinformatics                                                                        |
| 282 | 5P30CA036727-31 | Bioinformatics (Bisr)                                                                 |
| 283 | 5P30CA042014-28 | Research Informatics (Ri)                                                             |
| 284 | 5P30CA042014-28 | Utah Population Database (Updb)                                                       |
| 285 | 5P30CA047904-29 | Biostatistics Facility                                                                |
| 286 | 5P30DA035778-04 | Nida Center Of Excellence Of Computational Drug Abuse Research (Cdar)                 |
| 287 | 5P30EY001319-43 | Computing Module                                                                      |
| 288 | 5P30GM103324-05 | Computational Resources Core (Crc)                                                    |
| 289 | 5P30MH062294-15 | Interdisciplinary Research Methods Core                                               |
| 290 | 5P41EB015909-17 | Tr&D 3: Advanced Statistical Methods For Functional Mri                               |
| 291 | 5P41GM103504-08 | Tech R And D_Theme2                                                                   |
| 292 | 5P50AG033514-09 | Data Management And Statistical Core                                                  |
| 293 | 5P50CA097190-13 | Core 3 Informatics; Biostatistics; And Bioinformatics                                 |
| 294 | 5P50CA121973-10 | SPORE In Skin Cancer                                                                  |
| 295 | 5P50DC000422-29 | Defining Phenotypes Of Age-Related Hearing Loss                                       |
| 296 | 5P50DC014664-02 | Center For The Study Of Aphasia Recovery (C-STAR)                                     |
| 297 | 5P50GM107618-04 | Administrative Core                                                                   |
| 298 | 5P50GM107618-04 | Aim 4: Target Discovery For Common Disease Mechanisms                                 |
| 299 | 5P50GM107618-04 | Education Core                                                                        |
| 300 | 5P50GM107618-04 | Required Activities - Outreach                                                        |
| 301 | 5P50GM107618-04 | The HMS Laboratory Of Systems Pharmacology                                            |
| 302 | 5P50GM107618-04 | Translational Pharmacology Core                                                       |
| 303 | 5P50GM115305-04 | Precision Phenomics To Personalize Drug Therapy (P3dt)                                |
| 304 | 5P50GM115318-03 | Informatics Core - Pharmacogenomics Of Statin Therapy (POST)                          |
| 305 | 5P50MH090964-05 | Statistical Models With High-Dimensional Predictors                                   |
| 306 | 5R00ES022986-05 | Metal Mixtures; Children's Cognition; And Sensitive Developmental Windows             |
| 307 | 5R00LM011575-04 | A Framework To Enhance Decision Support By Invoking Nlp: Methods And Applications     |
| 308 | 5R00LM011595-05 | Novel Integrative Method To Detect Biomarkers Of Breast Cancer Resistance             |
| 309 | 5R00LM012104-03 | Natural Language Question Understanding For Electronic Health Records                 |
| 310 | 5R01AA018673-07 | Implementation Of Technology-Based Evaluation Of Motivational Interviewing            |
| 311 | 5R01AA024391-03 | Dynamic; Real-Time Prediction Of Alcohol Use Lapse Using Mhealth Technologies         |
| 312 | 5R01AG021155-12 | The Longitudinal Course O\F Imaging Biomarkers In People At Risk Of Ad                |
| 313 | 5R01AG041721-06 | Quantifying Brain Abnormality By Multimodality Neuroimage Analysis                    |
| 314 | 5R01AG042525-05 | Metabolic Costs Of Daily Activities In Older Adults                                   |
| 315 | 5R01AG049371-03 | Imaging Genomics Based Brain Disease Prediction                                       |
| 316 | 5R01AG053163-02 | A Personalized Health Behavior System To Promote Well-Being In Older Adults           |
| 317 | 5R01AG054069-02 | The Macrovascular And Microvascular Contributions To Alzheimer's Disease: Mesa Vascad |
| 318 | 5R01AI116794-02 | Biomedical Computing And Informatics Strategies For Infectious Disease Research       |
| 319 | 5R01AI117011-02 | Tracking Evolution And Spread Of Viral Genomes By Geospatial Observation Error        |

|     |                 |                                                                                                     |
|-----|-----------------|-----------------------------------------------------------------------------------------------------|
| 320 | 5R01AI118833-03 | Nasal Biomarkers Of Asthma                                                                          |
| 321 | 5R01AI127472-02 | Enhanced Detection System For Healthcare-Associated Transmission Of Infection                       |
| 322 | 5R01AR065479-04 | Development And Dissemination Of Muscleminer: An Imaging Informatics Tool For Mus                   |
| 323 | 5R01AT008448-04 | Pain Care Quality And Integrated And Complementary Health Approaches                                |
| 324 | 5R01AT008561-03 | Single Session Pain Catastrophizing Treatment: Comparative Efficacy & Mechanisms                    |
| 325 | 5R01CA158925-05 | Integration Of Endoscopic And Ct Data For Radiation Therapy Treatment Planning                      |
| 326 | 5R01CA172343-05 | Digital Pathology_Accuracy Viewing Behavior And Image Characterization                              |
| 327 | 5R01CA193730-02 | Mri-Based Radiation Therapy Treatment Planning                                                      |
| 328 | 5R01CA197000-02 | Multi-Parametric 4-D Imaging Biomarkers For Neoadjuvant Treatment Response                          |
| 329 | 5R01CA198121-02 | Dose-Distribution Radiomics To Predict Morbidity Risk In Radiotherapy                               |
| 330 | 5R01CA199673-03 | Automated Image Guidance For Diagnosing Skin Cancer With Confocal Microscopy                        |
| 331 | 5R01CA200690-02 | Improving Melanoma Pathology Accuracy Through Computer Vision Techniques - The Impact Study         |
| 332 | 5R01CA200859-02 | Hardwiring Mechanism Into Predicting Cancer Phenotypes By Computational Learning                    |
| 333 | 5R01CA202752-02 | Computerized Histologic Image Predictor Of Cancer Outcome                                           |
| 334 | 5R01CA203984-02 | 3-D Modeling-Based Decision Support For Optimizing Quality Of Life Following Breast Reconstruction  |
| 335 | 5R01CA204261-02 | Integrated Discovery Pipeline For Tumor Neoantigens                                                 |
| 336 | 5R01CA206100-02 | Automatic Pelvic Organ Delineation In Prostate Cancer Treatment                                     |
| 337 | 5R01CA206180-02 | Quantitative Multimodal Image Guidance For Improved Liver Cancer Treatment                          |
| 338 | 5R01CA208517-02 | Determinants Of Pancreatic Cancer And Malignant Melanoma Phenotypes In Cdkn2a Hereditary Kindreds   |
| 339 | 5R01CA214085-02 | Sch: Exp: Improving Early Detection And Intervention Of Lymphedema                                  |
| 340 | 5R01DA035484-05 | Fmri-Based Biomarkers For Multiple Components Of Pain                                               |
| 341 | 5R01DA039159-02 | Reducing Non-Medical Opioid Use: An Automatically Adaptive Mhealth Intervention                     |
| 342 | 5R01DA040487-03 | Coinstac: Decentralized; Scalable Analysis Of Loosely Coupled Data                                  |
| 343 | 5R01DC004689-13 | Therapeutic Approaches To Dysarthria: Acoustic And Perceptual Correlates                            |
| 344 | 5R01DC007124-11 | Dynamics Of Vocal Tract Shaping                                                                     |
| 345 | 5R01DC009834-08 | Clinic Interactions Of A Brain-Computer Interface For Communication                                 |
| 346 | 5R01DC013547-04 | Speech Movement Classification For Assessing And Treating Als                                       |
| 347 | 5R01DC014290-03 | Using Machine Learning To Mitigate Reverberation Effects In Cochlear Implants                       |
| 348 | 5R01DC014498-02 | Computational Methods For The Study Of American Sign Language Nonmanuals Using Very Large Databases |
| 349 | 5R01DK108073-04 | Statistical Methods For Healthcare In Complex Patients With Diabetes                                |
| 350 | 5R01EB001988-22 | New Statistical Methods For Medical Signals And Images                                              |
| 351 | 5R01EB004640-11 | Graph-Based Medical Image Segmentation In 3d And 4d                                                 |
| 352 | 5R01EB006841-10 | Multivariate Methods For Identifying Multitask/Multimodal Brain Imaging Biomarkers                  |
| 353 | 5R01EB008374-07 | 4d Software Tools For Longitudinal Prediction Of Brain Disease                                      |
| 354 | 5R01EB016728-04 | Optimization Of Mr Fingerprinting (Mrf) For Quantitative Mri                                        |
| 355 | 5R01EB019403-03 | Secondary Use Of Emrs For Surgical Complication Surveillance                                        |

|     |                 |                                                                                                                             |
|-----|-----------------|-----------------------------------------------------------------------------------------------------------------------------|
| 356 | 5R01EB021360-02 | Machine Learning And Collaborative Filtering Tools For Personalized Education In Digital Breast Tomosynthesis               |
| 357 | 5R01EB021900-02 | Sch: Int A.Soclotechnilcal Systems Systems Approach For Improving Tuberculosis Diagnostics Using Mobile Health Technologies |
| 358 | 5R01EB022573-02 | Pattern Analysis Of Fmri Via Machine Learning/Sparse Models: Application To Brain Development                               |
| 359 | 5R01EB022880-02 | Diagnosis Of Alzheimer's Disease Using Dynamic High-Order Brain Networks                                                    |
| 360 | 5R01EB022883-02 | Manifold-Valued Statistical Models For Longitudinal Morphometric Analysis In Preclinical Alzheimer's Disease (Ad)           |
| 361 | 5R01ES026033-02 | Novel Biomarker To Identify Critical Windows Of Susceptibility To Metal Mixture                                             |
| 362 | 5R01EY023279-05 | 3d Image Analysis Approach To Determine Severity And Cause Of Optic Nerve Edema                                             |
| 363 | 5R01EY026593-02 | Developing Classification Criteria For The Uveitides                                                                        |
| 364 | 5R01GM071966-12 | Integration And Visualization Of Diverse Biological Data                                                                    |
| 365 | 5R01GM088224-07 | Real-Time Detection Of Deviations In Clinical Care In Icu Data Streams                                                      |
| 366 | 5R01GM097618-06 | Machine Learning For Identifying Adverse Drug Events                                                                        |
| 367 | 5R01GM101430-05 | Mining Health Data For Drug Safety Profiles                                                                                 |
| 368 | 5R01GM108731-03 | A Three-Population Three-Scale Social Network Model To Assess Disease Dispersion                                            |
| 369 | 5R01GM111324-03 | Comparative Assessment Framework For Environments Of Trauma Care                                                            |
| 370 | 5R01GM114290-03 | Finding Good Temporal Postoperative Pain Signatures (Tempos)                                                                |
| 371 | 5R01GM114355-02 | Extended Methods And Software Development For Health Nlp                                                                    |
| 372 | 5R01GM114434-03 | Boosting The Translational Impact Of Scientific Competitions By Ensemble Learning                                           |
| 373 | 5R01GM117622-02 | Machine Learning Of Physiological Variables To Predict Diagnose And Treat Cardiorespiratory Instability                     |
| 374 | 5R01GM122062-02 | Transmission Networks In Trait-Based Communities                                                                            |
| 375 | 5R01HD076756-05 | Profiling Vulvodynia Based On Neurobiological And Behavioral Endophenotypes                                                 |
| 376 | 5R01HD083431-02 | Novel Approaches For Predicting Unstructured Short Periods Of Physical Activities In Youth                                  |
| 377 | 5R01HD084628-03 | Misfoldome-Centered Multiomics Approach To Unravel Preeclampsia Subphenotypes.                                              |
| 378 | 5R01HD087133-03 | Sch: Gear - Grounded Early Adaptive Rehabilitation                                                                          |
| 379 | 5R01HL089765-09 | High Performance Automated System For Analysis Of Fast Cardiac Spect                                                        |
| 380 | 5R01HL116522-05 | An Evaluation Of Novel Domains For Predicting 30-Day Readmission                                                            |
| 381 | 5R01HL121226-04 | Integrated Rf And B-Mode Deformation Analysis For 4d Stress Echocardiography                                                |
| 382 | 5R01HL122010-04 | Decrypting Variants Of Uncertain Significance In Long-Qt Syndrome                                                           |
| 383 | 5R01HL122484-04 | Probing Dose Limits In Cardiac Spect With Reconstruction And Personalized Imaging                                           |
| 384 | 5R01HL122639-03 | Cora_Tm_A Personalized Cardiac Counselor For Optimal Therapy                                                                |
| 385 | 5R01HL125089-03 | Ehr Anticoagulants Pharmacovigilance                                                                                        |
| 386 | 5R01HL125583-03 | Integrative Genomics Of Clinical Subtypes In Copdgene                                                                       |
| 387 | 5R01HL126667-03 | Asthma Ascertainment And Characterization Through Electronic Health Records                                                 |
| 388 | 5R01HL127028-03 | Transition From Risk Factors To Early Hf: Prevalence; Pathogenesis; And Phenomics                                           |
| 389 | 5R01HL127661-03 | Innovative Mri-Based Characterization Of Cardiac Dyssynchrony                                                               |



|     |                 |                                                                                                                                        |
|-----|-----------------|----------------------------------------------------------------------------------------------------------------------------------------|
| 390 | 5R01HL133616-02 | Automated Quantitative Ct Imaging Of Epicardial Adipose Tissue And Risk Of Cardiac Events                                              |
| 391 | 5R01LM008111-12 | Developing And Applying Information Extraction Resources And Technology To Create                                                      |
| 392 | 5R01LM009254-11 | Bio Text Nlp                                                                                                                           |
| 393 | 5R01LM010090-07 | Temporal Relation Discovery For Clinical Text                                                                                          |
| 394 | 5R01LM010207-09 | Automated Detection Of Anomalous Accesses To Electronic Health Records                                                                 |
| 395 | 5R01LM010681-08 | Interactive Machine Learning Methods For Clinical Natural Language Processing                                                          |
| 396 | 5R01LM010685-08 | From Gwas To Phewas: Scanning The Emr Phenome For Gene-Disease Associations                                                            |
| 397 | 5R01LM010817-06 | Text Mining Pipeline To Accelerate Systematic Reviews In Evidence-Based Medicine                                                       |
| 398 | 5R01LM011663-04 | A New Generation Clinical Decision Support System                                                                                      |
| 399 | 5R01LM011829-04 | Patient Medical History Representation; Extraction; And Inference From Ehr Data                                                        |
| 400 | 5R01LM011934-04 | Semi-Structured Information Retrieval In Clinical Text For Cohort Identification                                                       |
| 401 | 5R01LM011975-03 | Evidence-Based Strategy And Tool To Simplify Text For Patients And Consumers                                                           |
| 402 | 5R01LM012012-03 | Bioinformatics Strategies To Relate Age Of Onset With Gene-Gene Interaction                                                            |
| 403 | 5R01LM012086-03 | Semi-Automating Data Extraction For Systematic Reviews                                                                                 |
| 404 | 5R01LM012095-03 | Development And Evaluation Of A Learning Electronic Medical Record System                                                              |
| 405 | 5R01LM012309-02 | Predicting Diabetic Retinopathy From Risk Factor Data And Digital Retinal Images                                                       |
| 406 | 5R01LM012355-03 | The Next Frontier In Diabetes Communication: Promoting Health Literacy In The Era Of Secure Messaging                                  |
| 407 | 5R01MH059929-17 | Course And Outcome Of Bipolar Disorder In Youth                                                                                        |
| 408 | 5R01MH085651-08 | Decision Processes Of Late-Life Suicide                                                                                                |
| 409 | 5R01MH096773-06 | Characterizing Mechanistic Heterogeneity Across Adhd And Autism                                                                        |
| 410 | 5R01MH100482-05 | Artificial Intelligence In A Mobile Intervention For Depression (Aim)                                                                  |
| 411 | 5R01MH103539-03 | Treatment Utilization Before Suicide (Tubs)                                                                                            |
| 412 | 5R01MH104414-04 | Connectomics In Psychiatric Classification                                                                                             |
| 413 | 5R01MH105355-03 | Neural Signature Of Fear Overgeneralization In Trauma Exposed Adults                                                                   |
| 414 | 5R01MH106577-02 | Natural Language Processing For Characterizing Psychopathology                                                                         |
| 415 | 5R01MH107558-02 | Thought Disorder And Social Cognition In Clinical Risk States For Schizophrenia                                                        |
| 416 | 5R01MH107797-03 | Inside The Social Perception Network: Dynamics; Connectivity; And Stimulation                                                          |
| 417 | 5R01MH109320-03 | Dot Diary (D2): Developing A Mobile App With Combined Automated Dot And Daily Sexual Diary For Monitoring And Improving Prep Adherence |
| 418 | 5R01MH109329-02 | Socioemotional Processing In Female Offenders - Resubmission 01                                                                        |
| 419 | 5R01MH109496-02 | Novel Methods For Evaluation And Implementation Of Behavioral Intervention Technologies For Depression                                 |
| 420 | 5R01MH109507-02 | Risk Profiles For Suicidal Behavior In The General Population                                                                          |
| 421 | 5R01MH110483-02 | Study Of Early Brain Alterations That Predict Development Of Chronic Ptsd                                                              |
| 422 | 5R01MH110514-02 | Behavioral; Physiological; And Quantitative Models Of Pro-Social Behavior                                                              |
| 423 | 5R01NR013912-05 | Predicting Patient Instability Noninvasively For Nursing Care-Two (Ppinnc-2)                                                           |
| 424 | 5R01NS042645-14 | Predicting Brain Tumor Progression Via Multiparametric Image Analysis And Modelin                                                      |
| 425 | 5R01NS047293-13 | Eeglab: Software For Analysis Of Human Brain Dynamics                                                                                  |

|     |                 |                                                                                                                                                         |
|-----|-----------------|---------------------------------------------------------------------------------------------------------------------------------------------------------|
| 426 | 5R01NS049251-11 | Multimodal Registration Of The Brain's Cortical Surface                                                                                                 |
| 427 | 5R01NS086885-04 | White Matter Damage In Subconcussive Blast Exposure                                                                                                     |
| 428 | 5R01NS088606-04 | Multi-Scale Network Dynamics Of Human Upper Limb Movements: Characterization And Translation To Neuroprosthetics                                        |
| 429 | 5R01NS089212-03 | A Brain Atlas For Mapping Connectivity In Focal Epilepsy                                                                                                |
| 430 | 5R01NS089729-04 | Neural Mechanisms For Reducing Interference During Episodic Memory Formation                                                                            |
| 431 | 5R01NS092882-03 | Reliable Seizure Prediction Using Physiological Signals And Machine Learning                                                                            |
| 432 | 5R01NS094399-03 | Characterizing High Frequency Oscillations As An Epilepsy Biomarker With Big Data Tools                                                                 |
| 433 | 5R01NS095741-03 | Stroke; Brain Networks; And Behavior                                                                                                                    |
| 434 | 5R01NS097000-02 | Whole Transcriptome Studies Of Patients With Transient Ischemic Attacks (Tias)                                                                          |
| 435 | 5R01NS098023-02 | Integrating Ehr And Genomics To Predict Multiple Sclerosis Drug Response                                                                                |
| 436 | 5R03DA040855-02 | Automated Speech Analysis: A Marker Of Drug Intoxication & Treatment Outcome                                                                            |
| 437 | 5R03ES026397-02 | Development Of Integrative Models For Early Liver Toxicity Assessment                                                                                   |
| 438 | 5R03MH108933-02 | Automated Linguistic Analyses Of Semantics And Syntax In Speech Output In The Psychosis Prodrome: A Novel Paradigm To Evaluate Subtle Thought Disorder. |
| 439 | 5R03MH109008-02 | Separating Wheat From Chaff In Major Depression Blood Biomarker Studies                                                                                 |
| 440 | 5R03MH109791-02 | Neuroanatomical Markers Of Persistence Versus Remission Of Adhd                                                                                         |
| 441 | 5R21AA024530-02 | Mediators And Moderators Of A Neighborhood Experiment On Alcohol Use                                                                                    |
| 442 | 5R21AG050122-02 | Multi-Modal Prediction Of Future Clinical Dementia                                                                                                      |
| 443 | 5R21AG053467-02 | Computational Modeling Of Semantic Decline In Alzheimer's Disease                                                                                       |
| 444 | 5R21CA194492-02 | Automated Ecological Video Identification Of Physical Activity (E-Vip) Software                                                                         |
| 445 | 5R21CA202130-02 | Deep Learning For Representation Of Codes Used For Seer-Medicare Claims Research                                                                        |
| 446 | 5R21CA209874-02 | Developing Enabling Pet-Ct Image Analysis Tools For Predicting Response In Radiation Cancer Therapy                                                     |
| 447 | 5R21DK108071-02 | Automated Coding Of Ecoaching Exchanges To Promote Healthier Eating                                                                                     |
| 448 | 5R21DK108104-02 | Promoting Utilization Of Kidneys By Improving Patient Level Decision Making                                                                             |
| 449 | 5R21EB022356-02 | Adaptive Prediction Of Blood Glucose Levels Using Wearable Physiological Sensors                                                                        |
| 450 | 5R21EB022747-02 | Deep-Radiomics-Learning For Mass Detection In Ct Colonography                                                                                           |
| 451 | 5R21HD086745-02 | Machine Learning Algorithms To Measure Physical Activity In Children With Cerebral Palsy                                                                |
| 452 | 5R21HD086754-02 | Childhood Obesity Surveillance Using Electronic Health Records Data                                                                                     |
| 453 | 5R21HL131385-02 | Simultaneous Imaging Of Myocardial Blood Flow And Glucose Metabolism Using Dynamic 18f-Fdg Pet                                                          |
| 454 | 5R21HL132277-02 | Computerized Visualization And Prediction Of Coronary Artery Ischemia                                                                                   |
| 455 | 5R21HL133891-02 | Endotypes Of Thrombocytopenia In The Critically Ill                                                                                                     |
| 456 | 5R21MH108999-02 | Building Multistage Treatment Regimens For Depression After Acute Coronary Syndromesyndrome                                                             |
| 457 | 5R21MH110758-02 | Machine Learning And Personalized Prognosis For Depression Treatment                                                                                    |
| 458 | 5R21NR015410-02 | Activity-Aware Prompting To Improve Medication Adherence In Heart Failure Patients                                                                      |
| 459 | 5R21NS090349-02 | Pattern Classification Using Magnetic Resonance Imaging In Traumatic Brain Injury                                                                       |

|     |                 |                                                                                                                                                |
|-----|-----------------|------------------------------------------------------------------------------------------------------------------------------------------------|
| 460 | 5R21NS093266-02 | Characterizing Intrinsic Functional Cortical Networks In Parkinson Disease Dementia                                                            |
| 461 | 5R21TW010245-02 | Low Cost Mobile Platform For Pulmonary Disease Screening                                                                                       |
| 462 | 5R24DK106766-02 | Vision: Validated Systematic Integration Of Epigenomic Data                                                                                    |
| 463 | 5R25EB022363-03 | Transforming Analytical Learning In The Era Of Big Data                                                                                        |
| 464 | 5R25EB022366-03 | The Big Dipa: Data Image Processing And Analysis                                                                                               |
| 465 | 5R33CA206922-02 | Online Raman Diagnostics Of Oncometabolites                                                                                                    |
| 466 | 5R33MH100268-04 | Development Of A Novel Neurotechnology To Promote Emotion Recognition In Autism                                                                |
| 467 | 5R34MH110583-02 | Scaling A Smarter And More Efficient Intervention: Evaluating The Feasibility Of Disseminating A Novel Mobile App Platform To Treat Depression |
| 468 | 5R35GM119582-02 | Statistical Methods For Real-Time Forecasts Of Infectious Disease: Dynamic Time-Series And Machine Learning Approaches                         |
| 469 | 5R42AG055375-04 | Development Of An Integrated High Throughput Imaging And Image Analysis Platform For Muscle                                                    |
| 470 | 5R42CA180190-03 | Automated Problem And Allergy Lists Enrichment Based On High Accuracy Information Extraction From The Electronic Health Record                 |
| 471 | 5R44AG050326-02 | Integrated Neurocognitive And Sleep-Behavior Profiler For The Endophenotypic Classification Of Dementia Subtypes (Inspecds)                    |
| 472 | 5R44EY026864-06 | Advanced Image Analysis Tools For Diabetic Retinopathy Telemedicine Application                                                                |
| 473 | 5R44HL125001-03 | Corband: A Novel Wearable Wrist Sensor For Heart Failure Remote Monitoring                                                                     |
| 474 | 5R44NS089090-03 | Mri Brain Morphometry For Computer-Aided Detection Of Neurological Disorders                                                                   |
| 475 | 5R44NS092209-03 | Advanced Morphological Analysis Of Cerebral Blood Flow For Acute Concussion Diagnosis And Return-To-Play Determination                         |
| 476 | 5R90DA043849-02 | Training A New Generation Of Computational Neuroscientists Bridging Neurobiology                                                               |
| 477 | 5SC2GM118266-02 | A Novel Probabilistic Methodology For Prediction Of Emerging Diseases In Patients With Multiple Chronic Conditions                             |
| 478 | 5T32HG002295-15 | Training In Bioinformatics And Integrative Genomics                                                                                            |
| 479 | 5T32LM012409-02 | Biomedical Data Science Graduate Training At Stanford                                                                                          |
| 480 | 5T32LM012417-02 | Biomedical Big Data Training Program At Uc Berkeley                                                                                            |
| 481 | 5T32LM012419-03 | University Of Washington Phd Training In Big Data For Genomics And Neuroscience                                                                |
| 482 | 5T32NS091006-03 | Training Program In Neuroengineering And Medicine                                                                                              |
| 483 | 5T90DA022762-12 | Interdisciplinary Training In Computational Neuroscience                                                                                       |
| 484 | 5T90DA043219-02 | Training A New Generation Of Computational Neuroscientists Bridging Neurobiology And Cognition                                                 |
| 485 | 5U01CA179106-04 | Biomarkers For Staging And Treatment Response Monitoring Of Bladder Cancer                                                                     |
| 486 | 5U01CA187947-03 | Computing; Optimizing; And Evaluating Quantitative Cancer Imaging Biomarkers                                                                   |
| 487 | 5U01CA195599-03 | Quantitative Parenchyma Descriptor As An Imaging Biomarker Of Breast Cancer Risk                                                               |
| 488 | 5U01DK065184-15 | Michigan Hepatotoxicity Clinical Research Network Renewal 2013                                                                                 |
| 489 | 5U01DK103149-04 | Clinical Center For Children: Pathogenesis; Biomarkers; And Antifibrotic Therapy                                                               |
| 490 | 5U01HG008390-03 | Mace2k - Molecular And Clinical Extraction: A Natural Language Processing Tool For Personalized Medicine                                       |
| 491 | 5U01HG008488-03 | Mining The Social Web To Monitor Public Health And Hiv Risk Behaviors                                                                          |

|     |                   |                                                                                                                                  |
|-----|-------------------|----------------------------------------------------------------------------------------------------------------------------------|
| 492 | 5U01HG009454-02   | Metadata Applications On Informed Content To Facilitate Biorepository Data Regulation And Sharing                                |
| 493 | 5U01MH110925-02   | Longitudinal Assessment Of Post-Traumatic Syndromes                                                                              |
| 494 | 5U19AI109713-04   | Bayesian Models To Accelerate Antibacterial Drug Discovery                                                                       |
| 495 | 5U24CA184407-04   | Cancer Deep Phenotype Extraction From Electronic Medical Records                                                                 |
| 496 | 5U24CA194215-02   | Advancing Cancer Pharmacoepidemiology Research Through EhRs And Informatics                                                      |
| 497 | 5U24CA210952-02   | Integrative Mirna Data Analysis For Clinical Cancer Genomics                                                                     |
| 498 | 5U24CA210972-02   | Proteogenomic Data Analysis For Cancer Systems Biology And Clinical Translation                                                  |
| 499 | 5U24CA210990-02   | Ucsc-Buck Specialized Genomic Data Analysis Center For The Genomic Data Analysis Network                                         |
| 500 | 5U54AI117924-04   | Administration                                                                                                                   |
| 501 | 5U54AI117924-04   | Bd2k Center Consortium                                                                                                           |
| 502 | 5U54AI117924-04   | Data Science Research                                                                                                            |
| 503 | 5U54AI117924-04   | Training                                                                                                                         |
| 504 | 5U54EB020403-04   | Data Science Research                                                                                                            |
| 505 | 5U54EB020403-04   | ENIGMA Center For Worldwide Medicine; Imaging & Genomics                                                                         |
| 506 | 5U54EB020405-04   | Data Science Research Core                                                                                                       |
| 507 | 5U54HD090256-02   | Impact Of Cgg Repeats On Fmr1 Gene Function And Human Health                                                                     |
| 508 | 5U54HG008098-04   | Data Analysis And Signature Generation Core                                                                                      |
| 509 | 5U54MD010706-02   | Data Integration Core                                                                                                            |
| 510 | 5U54MD010722-02   | Bio Repository Core                                                                                                              |
| 511 | 5UH2CA203708-02   | Crowd Sourcing Labels From Electronic Medical Records To Enable Biomedical Research                                              |
| 512 | 5UH2CA203711-02   | Crowdsourcing Mark-Up Of The Medical Literature To Support Evidence-Based Medicine And Develop Automated Annotation Capabilities |
| 513 | 5UH2CA203730-02   | Crowdsourcing-Aided Machine Learning For Colon Cancer Prevention                                                                 |
| 514 | 5UH2EB024407-02   | Crowd-Sourced Annotation Of Longitudinal Sensor Data To Enhance Data-Driven Precision Medicine For Behavioral Health             |
| 515 | 5UH2NS100599-02   | Multimodal Mri Biomarkers Of Small Vessel Disease For Older Persons With And Without Dementia.                                   |
| 516 | 7R01CA197398-03   | Computational Model Of Autophagy-Mediated Survival In Chemoresistant Lung Cancer                                                 |
| 517 | 7R01DC011805-07   | Imaging Genetics Of Spasmodic Dysphonia                                                                                          |
| 518 | 7R01MD010362-03   | Eliminating Tobacco-Related Disparities Amount African American Smokers                                                          |
| 519 | 7R01MH108728-02   | Understanding The Functional Impacts Of Genetic Variants In Mental Disorders                                                     |
| 520 | 7U24CA184407-05   | Cancer Deep Phenotype Extraction From Electronic Medical Records                                                                 |
| 521 | 9R01GM125072-05A1 | Nextgen Random Forests                                                                                                           |
| 522 | 1R01NS101718-01A1 | Whole Genome RNA Sequencing (Rnaseq) Of Blood From Patients With Lacunar Stroke                                                  |
| 523 | 1R21LM012578-01   | Implementing And Evaluating A Machine Learning Tool For Entity Resolution In Drug Use And Sexual Contact Networks Of YMSM        |
| 524 | 1R21MH114835-01   | Mhealth Monitoring Of Acoustic And Behavioral Patterns In Bipolar Disorder Across Cultures                                       |

|     |                   |                                                                                                |
|-----|-------------------|------------------------------------------------------------------------------------------------|
| 525 | 1UG3AT009758-01   | Engaging Veterans Seeking Service-Connection Payments In Pain Treatment                        |
| 526 | 2P50HD052120-11   | Project III: Understanding Risk For Early Language And Literacy Difficulties In Young Children |
| 527 | 2T15LM007033-34   | Biomedical Informatics Training At Stanford                                                    |
| 528 | 2T15LM007124-21   | University Of Utah Biomedical Informatics Training Grant                                       |
| 529 | 3R01EB021396-02S1 | Slicer+PLUS: Collaborative; Open-Source Software For Ultrasound Analysis                       |
| 530 | 5R01EB021396-02   | Slicer+PLUS: Collaborative; Open-Source Software For Ultrasound Analysis                       |
| 531 | 5R01NR015371-03   | NRI: An Egocentric Computer Vision Based Active Learning Co-Robot Wheelchair                   |
| 532 | 5R01NR016151-03   | Nri: Collaborative Research: Quadrupedal Human-Assistive Robotic Platform (Q-Harp)             |
| 533 | 5U01DA041089-03   | Abcd-Usa Consortium: Research Project                                                          |
| 534 | 5U54AI117924-04   | The Center For Predictive Computational Phenotyping-1 Overall                                  |
| 535 | 5U54GM114833-04   | A Community Effort To Translate Protein Data To Knowledge: An Integrated Platform              |
